# Supplementary material
Source: Springer Nature journal article supplement (https://www.springermedizin.de/resource/supplementary/12865_2010_364_MOESM7_ESM.pdf/9427840)

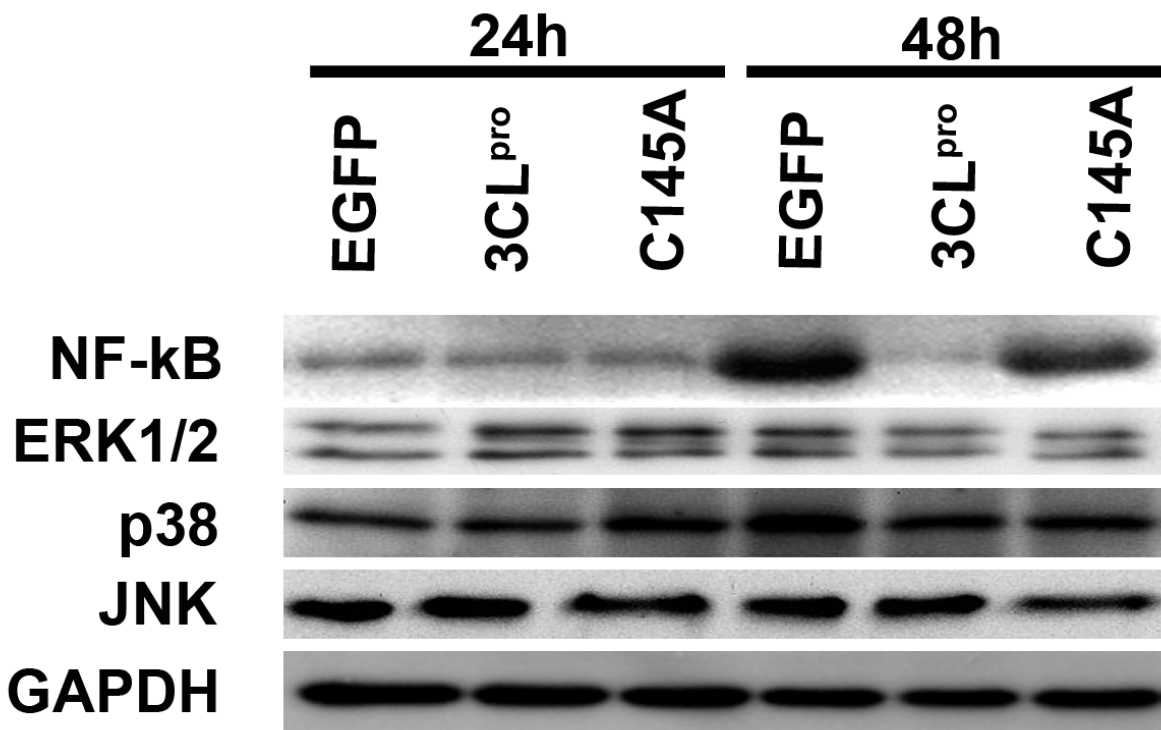

Supplement: MOESM7 [file 9427840]
